# Supplementary material for: Prevalence of Honeybee Parasites, Pests, and Their Associated Risk Factors in Central Ethiopia
Source: Research Square preprint supplement (doi:10.21203/rs.3.rs-8691322/v1), 2026-01-27
Supplement: Supplementary file 1 [file 547b223874bfebcb90f52d44.docx]

**Supplementary file**

Prevalence of Honeybee Parasites, Pests, and Their Associated Risk Factors in Central Ethiopia

**1. General background of respondents**

1.1 Date of interview______________

1.2 Region _____________1.3. Zone ____________1.4. Woreda _____________

1.5. PA/Kebele _________1.6. Village (Got) _______________

Part 1. Household characteristics

1.1. Name of the respondent _________________________

1.2. Sex: 1= Male 2= Female

Age: 1= 18-30 2= 31-45 3= Above 45

1.3. Marital status 1. Single 2. Married 3. Divorced 4. Widow 5. Widower

1.4. Education of the interviewee

1= Illiterate 2= Can read and write 3= Primary education (1-4)

4= Junior (5-8) 5= Secondary education (9-12) 6= College

7. Other (specify) _____________

2. **Beekeeping Activities**

2.1 Do you keep honeybees? 1. Yes 2. No

2.1.1. If yes, when did you start beekeeping? Traditional________ Frame hive______ year (s).

2.2 How do you start beekeeping for the 1st time?

1= Gift from parents 2= Catching swarms 3= Buying 4= package 5= others

2.3 What is the source of your colony number?

1= Catching swarms 2= Buying 3= Package 4= Multiplication 5= others----

2.4. How do you use beekeeping? 1= Main income 2= Sideline 3=Commercial

2.5 How many honeybee colonies do you own?

2.6 Where do you keep your bee colonies?

1=Backyard 2= Inside house 3=Closure areas 4= Hang on trees 5=others (specify)

2.7. For how many years your colony remains or stays in the hive 1=1 year 2= 2 years 3=3 years 4= 4 years 5=5 and above years

2.8. Types of beehives you own

Traditional _____________ transition ___________ main frame___________________

2.8.1. Does absconding occur in your bee colony? 1= Yes 2= No

2.9. What are the major causes for absconding? 1= Forage scarcity 2= pests &predators

3= disease & parasites 4=.Weather 5.Others (specify) ----

2.10. What is the trend of your bee colony number? 1= decrease 2= increase 3= no change

2.11. If there is a decrease in trend in the number of bee colonies and honey yields over the year, what are the causes in order of importance?

| No | Causes | Rank |
| --- | --- | --- |
| 1 | Lack of bee forage |  |
| 2 | Lack of water |  |
| 3 | Drought |  |
| 4 | Migration |  |
| 5 | Absconding |  |
| 6 | Pests and predators |  |
| 7 | Diseases |  |
| 8 | Pesticides and herbicides Application |  |
| 9 | Death of the colony |  |
| 10 | Decrease in the price of honey |  |
| 11 | Increased cost of production |  |
| 12 | Lack of credit |  |
| 13 | Others (specify) |  |

2.12. What are the major pests and predators found in the area that threaten your colonies? List in order of importance

| No | Pest /Predators | Rank | Season of occurrences | Effect | Local control |
| --- | --- | --- | --- | --- | --- |
| 1 | Ants |  |  |  |  |
| 2 | Wax moth |  |  |  |  |
| 3 | Bee lice/mites |  |  |  |  |
| 4 | Beetle |  |  |  |  |

*Effect= 1. colony dwindle 2. Colony death 3. Absconding 4. Direct honey loss*

2.13. In which hives your colonies do more likely affected by the diseases?

| No | Types of hive | Response | If yes, put the reason |
| --- | --- | --- | --- |
| 1 | Traditional | 1. Yes 2 No |  |
| 2 | Moveable frame | 1. yes 2. No |  |
| 3 | intermediate | 1. Yes 2 No |  |

**3. Bee colony management and honey**

3.1. Do you visit and inspect your beehives and colonies? 1. Yes____2. No_____

3.2. Do you clean your apiary? 1. Yes 2. No

3.3. Does swarming occur in your colonies or locality? 1= Yes 2=No

3.4. From where do you get the beeswax? 1= Own 2=Market 3= weroda input 4=tej

House 5=No use 6=Others (specify)___________________
